# Supplementary material for: 2′,3′,4′-Trihydroxychalcone changes estrogen receptor α regulation of genes and breast cancer cell proliferation by a reprogramming mechanism
Source: Springer Nature journal article supplement (doi:10.1186/s10020-022-00470-z), 2022-04-25
Supplement: MOESM1 [file 10020_2022_470_MOESM1_ESM.pdf]

**Table S1A Primers sequence for RT-PCR**

| Gene   | Forward                  | Reverse                  |
|--------|--------------------------|--------------------------|
| MSMB   | GTGATCTTTGCCACCTTCGT     | CGTAGCAAGTGCATGTCTCA     |
| OTOF   | CAAAGACGGCAAAGTGGACG     | GGCTTCCTCTGACCGTTCT      |
| KCNK6  | GCCCGTCTCTGAGCCTTGATTCCT | AGGCTGGATTGGGCCTAGTCCC   |
| NKG2E  | GCCAGCATTTTACCTTCCTCA    | AACATGATGAAACCCCGTCTA    |
| K6iRS3 | ACAGGGGCTGGCTTTGGATTGAG  | GGCAGACTACTGGGAAATGGGCTG |
| UBD    | TGTGGAGTCAGGTGATGAGG     | CTGCCATCATCTTCCCATCT     |
| KRT19  | TCGCCAAGATCCTG           | GCCTCCGTTTCTGC           |
| FGR    | CAACCCTCTCTGGCGGTGGC     | GCTTGGGGCCAGAGCGGATG     |
| c-MYC  | GGAAAACCAGCAGCCTCCCGC    | ACGGCTGCACCGAGTCGTAG     |
| GAPDH  | CGATGCTGGCGCTGAGTACGT    | CCTGCAAATGACCCCCAGCCTTC  |

**Table S1B Primers sequence for ChIP**

| Gene  | Forward              | Reverse               |
|-------|----------------------|-----------------------|
| KRT19 | TCCAGCCTGGGTGACAGAGC | TCCAAGTTCACCCCAACCTGA |
| c-MYC | ACAAGGATGCGGTTTGTCA  | CGCCTACCATTTTCTTTTGC  |
