# Supplementary material for: 2′,3′,4′-Trihydroxychalcone changes estrogen receptor α regulation of genes and breast cancer cell proliferation by a reprogramming mechanism
Source: Springer Nature journal article supplement (doi:10.1186/s10020-022-00470-z), 2022-04-25

E2vsControl\_GO\_enrichment.png

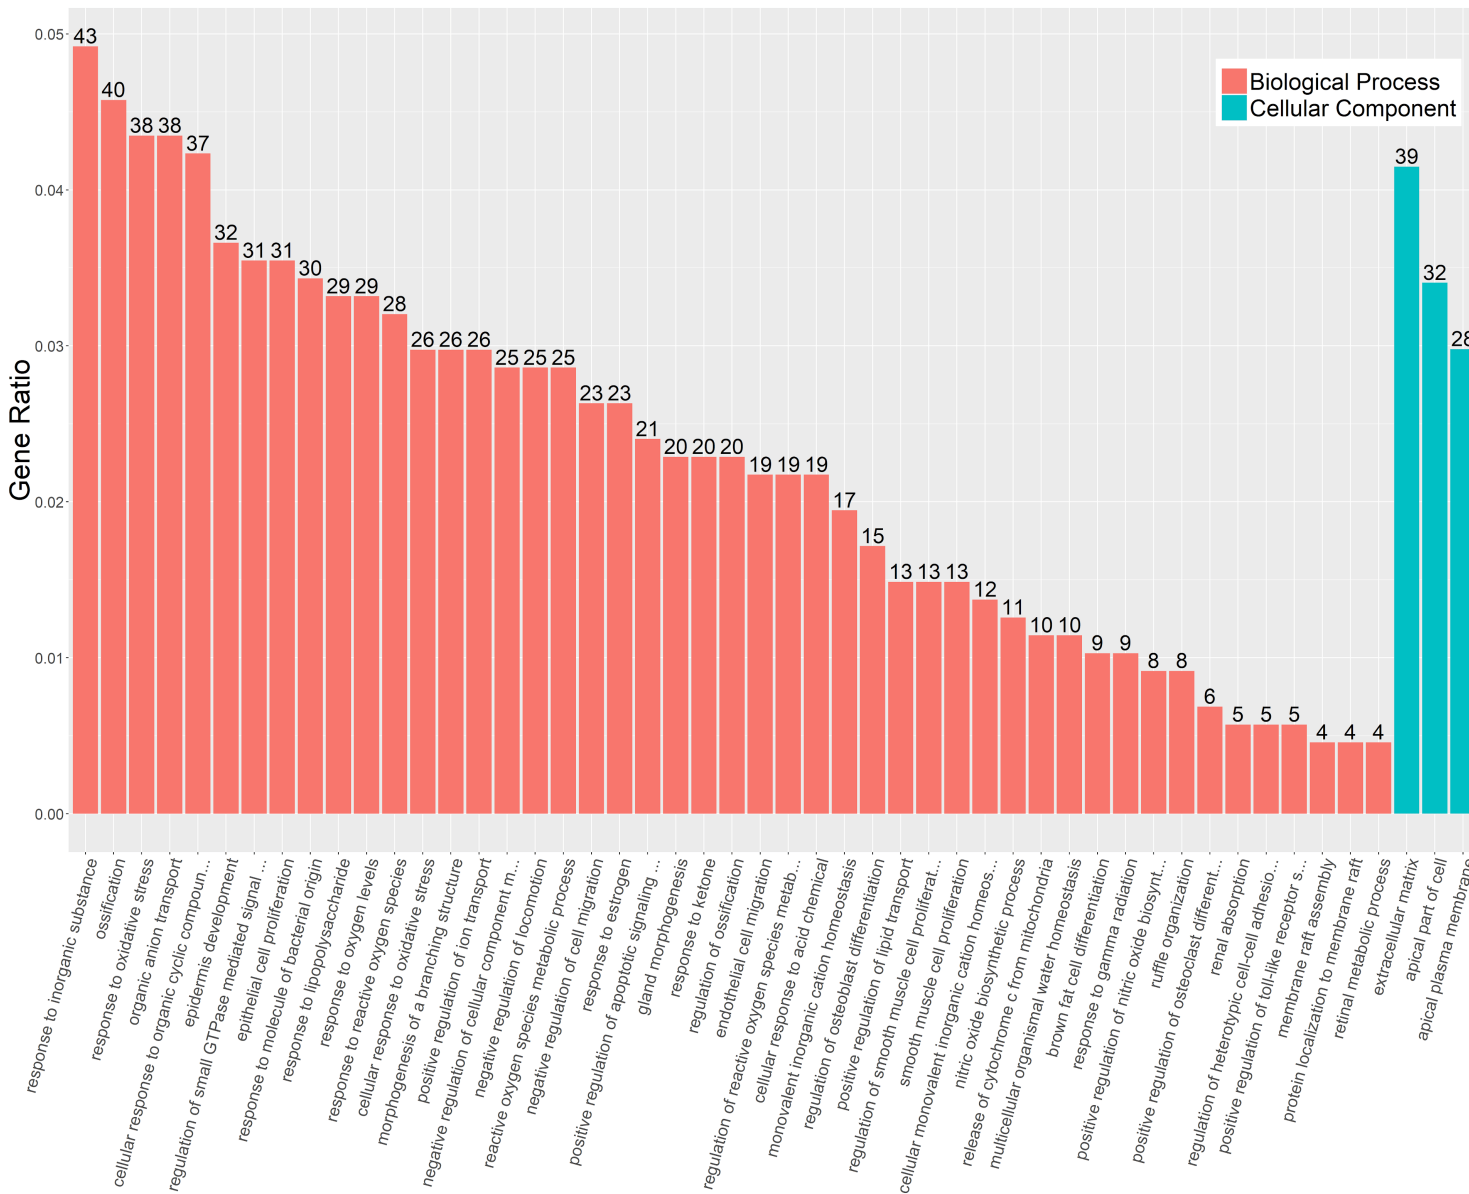

Supplement: MOESM3 [file 10020_2022_470_MOESM3_ESM.pdf]
